# Supplementary material for: The Effect of High Lateral Position on Antibiotic Exposure Duration in Patients with Severe Traumatic Brain Injury: A Retrospective Observational Cohort Study
Source: Research Square preprint supplement (doi:10.21203/rs.3.rs-6365655/v1), 2025-05-09
Supplement: Supplementary file 1 [file d80e8ee0adda5842252df4fd.docx]

**Table1 Baseline characteristics of patients**

| **Variables** | **Total (n = 138)** | **sTBI Patients** | | **P value** |
| --- | --- | --- | --- | --- |
| **Non-HLP Group n=93** | **HLP Group n=45** |
| **Gender** |  |  |  |  |
| Male | 114 (82.6) | 77 (82.8) | 37 (82.2) | 0.934 |
| Female | 24 (17.4) | 16 (17.2) | 8 (17.8) |  |
| **Age,years** | 56.8 ± 16.5 | 55.4 ± 16.8 | 59.7 ± 15.5 | 0.151 |
| **Epidural hematoma, n (%)** | 71 (51.4) | 48 (51.6) | 23 (51.1) | 0.956 |
| **Subdural hematoma, n (%)** | 53 (38.4) | 37 (39.8) | 16 (35.6) | 0.632 |
| **Basal fracture, n (%)** | 70 (50.7) | 48 (51.6) | 22 (48.9) | 0.764 |
| **Subarachnoid hemorrhage, n (%)** | 30 (21.7) | 21 (22.6) | 9 (20) | 0.73 |
| **Calvarial fractures,n (%)** | 47 (34.1) | 30 (32.3) | 17 (37.8) | 0.521 |
| **Diabetes Mellitus, n (%)** | 27 (19.6) | 20 (21.5) | 7 (15.6) | 0.409 |
| **IHD, n (%)** | 4 ( 2.9) | 2 (2.2) | 2 (4.4) | 0.596 |
| **Hypertension,n (%)** | 52 (37.7) | 32 (34.4) | 20 (44.4) | 0.254 |
| **COPD,n (%)** | 7 ( 5.1) | 6 (6.5) | 1 (2.2) | 0.427 |
| **CHD,n (%)** | 7 ( 5.1) | 5 (5.4) | 2 (4.4) | 1 |
| **MAP** | 86.2 ± 16.9 | 86.8 ± 17.3 | 84.8 ± 16.0 | 0.501 |
| **Vasoactive drugs, n(%)** | 62 (44.9) | 41 (44.1) | 21 (46.7) | 0.775 |
| **GCS score** | 5.0 ± 1.9 | 5.2 ± 2.0 | 4.7 ± 1.6 | 0.167 |
| **APACHE II,score** | 30.7 ± 7.9 | 30.4 ± 8.5 | 31.3 ± 6.4 | 0.549 |
| **SOFA,score** | 12.0 ± 3.4 | 11.8 ± 3.8 | 12.4 ± 2.2 | 0.331 |
| **RASS,score** | -3.6 ± 0.7 | -3.5 ± 0.8 | -3.7 ± 0.5 | 0.088 |
| **PH day1** | 7.4 ± 0.1 | 7.4 ± 0.1 | 7.4 ± 0.1 | 0.895 |
| **PaCO2 day1** | 42.9 ± 7.6 | 43.3 ± 8.0 | 42.0 ± 6.7 | 0.336 |
| **PaO2day1** | 131.2 ± 47.1 | 132.9 ± 50.2 | 127.6 ± 40.0 | 0.536 |
| **P/F day1** | 286.1 ± 118.1 | 292.5 ± 125.5 | 273.0 ± 101.3 | 0.364 |
| **PCT day1** | 1.2 (0.7, 3.0) | 1.3 (0.8, 3.0) | 1.0 (0.5, 2.5) | 0.171 |
| **WBC day1** | 14.0 ± 4.2 | 13.7 ± 3.3 | 14.5 ± 5.6 | 0.261 |
| **PH day7** | 7.4 ± 0.1 | 7.4 ± 0.1 | 7.4 ± 0.1 | 0.945 |
| **PaCO2 day7** | 41.9 ± 8.4 | 43.1 ± 9.7 | 39.5 ± 3.9 | 0.018 |
| **PaO2 day7** | 157.6 ± 49.3 | 153.5 ± 49.9 | 166.2 ± 47.5 | 0.158 |
| **P F day7** | 349.3 ± 103.6 | 342.0 ± 106.8 | 364.4 ± 96.2 | 0.235 |
| **PCT day7** | 0.4 (0.2, 1.2) | 0.5 (0.2, 1.3) | 0.2 (0.1, 0.5) | 0.01 |
| **WBC day7,** | 11.3 ± 3.8 | 12.0 ± 3.8 | 10.0 ± 3.5 | 0.004 |
| **X28 days death , n (%)** | 21 (15.2) | 17 (18.3) | 4 (8.9) | 0.15 |
| **Mechanical ventilation,days** | 8.0 (6.0, 10.8) | 9.0 (7.0, 11.0) | 7.0 (5.0, 8.0) | 0.004 |
| **Length of ICU stay,** | 12.1 ± 5.7 | 12.6 ± 6.1 | 11.0 ± 4.8 | 0.135 |
| **Duration of antibiotic exposure,** | 11.5 ± 5.6 | 12.4 ± 6.1 | 9.5 ± 4.0 | 0.004 |
| **Tracheostomy,n (%)** | 22 (15.9) | 19 (20.4) | 3 (6.7) | 0.038 |

**Table2 Univariate analysis for duration of antibiotic exposure**

| **Covariate** | **β (95%CI)** | **P value** |
| --- | --- | --- |
| High lateral position | -2.93 (-4.9,-0.96) | 0.004 |
| Gender | -0.07 (-2.58,2.45) | 0.957 |
| Age years | 0.04 (-0.01,0.1) | 0.128 |
| Epidural hematoma | 1.67 (-0.22,3.55) | 0.082 |
| Subdural hematoma | 0.99 (-0.96,2.94) | 0.318 |
| Basal fracture | 1.04 (-0.85,2.94) | 0.278 |
| Subarachnoid hemorrhage | 0.4 (-1.91,2.71) | 0.731 |
| Calvarial fractures | 0.07 (-1.94,2.08) | 0.945 |
| Diabetes Mellitus | 1.56 (-0.83,3.95) | 0.198 |
| IHD | 0.79 (-4.89,6.46) | 0.784 |
| Hypertension | 1.07 (-0.89,3.03) | 0.281 |
| COPD | 9.72 (5.71,13.74) | < 0.001 |
| CHD | 1.44 (-2.89,5.78) | 0.511 |
| MAP | 0 (-0.05,0.06) | 0.944 |
| vasoactive drugs | 0.85 (-1.06,2.76) | 0.382 |
| GCS score | 0.1 (-0.4,0.61) | 0.685 |
| APACHE II score | -0.07 (-0.19,0.05) | 0.265 |
| SOFA score | -0.03 (-0.32,0.25) | 0.819 |
| RASS score | 0.58 (-0.78,1.94) | 0.398 |
| PH day1 | 0.02 (-1.04,1.07) | 0.975 |
| PaCO2 day1 | -0.01 (-0.13,0.12) | 0.913 |
| PaO2 1 | -0.02 (-0.04,0) | 0.039 |
| P/F day1 | -0.01 (-0.01,0) | 0.199 |
| PCT day1 | 0.04 (-0.06,0.14) | 0.395 |
| WBC day1 | -0.15 (-0.38,0.07) | 0.179 |
| PH day7 | 0.98 (-0.12,2.09) | 0.08 |
| PaCO2 day7 | -0.04 (-0.15,0.07) | 0.483 |
| PaO2 day7 | -0.02 (-0.04,0) | 0.018 |
| P/F day7 | -0.01 (-0.02,0) | 0.011 |
| PCT day7 | -0.03 (-0.13,0 08) | 0.579 |
| WBC day7 | -0.11 (-0.36,0 14) | 0.396 |

**Table3 Multivariate analyses of risk factors associated with duration of antibiotic exposure**

|  | **Model I** |  | **Model II** |  | **Model III** |  |
| --- | --- | --- | --- | --- | --- | --- |
|  | **β (95%CI)** | **P value** | **β (95%CI)** | **P value** | **β (95%CI)** | **P value** |
| **Age** |  |  |  |  |  |  |
| **Per 10** | 0.45 (-0.13,1.02) | 0.128 | 0.45 (-0.13~1.03) | 0.128 | 0.45 (-0.13~1.03) | 0.128 |
| **<65** | Reference |  | **Reference** |  | **Reference** |  |
| **≥65** | 2.26 (0.29,4.24) | 0.025 | 2.75 (-0.44~5.95) | 0.094 | 2.75 (-0.44~5.95) | 0.094 |
| **Gender** |  |  |  |  |  |  |
| **Male** | -0.07 (-2.58,2 45) | 0.957 |  |  |  |  |
| **Female** | Reference |  | Reference |  | Reference |  |
| **HLP** |  |  |  |  |  |  |
| **no** | Reference |  | Reference |  | Reference |  |
| **yes** | -2.93 (-4.9,-0.96) | 0.004 | -3.17 (-5.13~-1.22) | 0.002 | -2.58 (-4.44~-0.71) | 0.008 |
| **COPD** |  |  |  |  |  |  |
| **no** | Reference |  | Reference |  | Reference |  |
| **yes** | 9.72 (5.71,13.74) | < 0.001 | 9.69 (5.43~13.94) | <0.001 | 8.78 (4.42~13.13) | <0.001 |
| **PaO2day1(Per 10)** | -0.21 (-0.41,-0.01) | 0.039 | -0.18 (-0.39~0.04) | 0.115 | -0.09 (-0.33~0.14) | 0.445 |
| **P/F day7(Per 10)** | -0.12 (-0.21,-0.03) | 0.011 | -0.11 (-0.2~-0.01) | 0.027 | -0.09 (-0.19~0.01) | 0.084 |

**Data presented are β and 95% CIs**

**ModelI: Did not adjust any covariants**

**Model II: Adjusted age, gender**

**Model III: Adjusted age, gender, COPD,PaO2day1,P/F day7.**
